**Regulation of *yefM/yoeB* toxin antitoxin system is independent of ppGpp and inorganic polyphosphate in *Escherichia coli*.**

**Bhaskar Chandra Mohan Ramisetty<sup>1, 2\*</sup>**

**<sup>1</sup>Department of Biochemistry and Molecular Biology, University of Southern Denmark, Campusvej 55, 5230 Odense M, Denmark**

**<sup>2</sup>Present address: School of Chemical and Biotechnology, SASTRA University, Thanjavur, India, 613402**

**Email: [ramisettybcm@biotech.sastra.edu](mailto:ramisettybcm@biotech.sastra.edu)**

**Mobile: +91 8122609945**

## ABSTRACT

**Bacterial persistence is a phenomenon wherein small proportion of a bacterial population attains transient antibiotic tolerance likely by virtue of metabolic minimization. Type II Toxin–Antitoxin systems (TAs), small overlapping bicistronic negative auto-regulons, were recently shown to induce the persistence state. Maisonneuve et al., 2013 reported that TAs are activated by a regulatory cascade consisting of stochastic accumulation of ppGpp leading to accumulation of inorganic polyphosphate (polyP). PolyP supposedly is essential for Lon protease-dependent degradation of antitoxins resulting in activation of toxins and induction of persistence phenotype. In contrast, using semi-quantitative primer extension, we show that transcriptional up-regulation of *yefM/yoeB* loci, one of the well characterized TAs of *Escherichia coli*, is independent of ppGpp and polyP. Similarly, we show that chromosome-encoded YoeB-dependent target mRNA cleavage is independent of polyP. Our results and meta-analysis of literature we conclude that the regulation of *yefM/yoeB* TAs is independent of ppGpp and polyP.**

1 **Keywords: Stringent response, Persistence, RelBE, Toxin antitoxin systems**

2

3

4

5

6

7

8

9

10

11

12

13

14

15

16

17

18

## 19 INTRODUCTION

20 Toxin–antitoxin systems (TAs) are operons consisting of two or three adjacent genes which  
21 code for a toxin, which has the potential to inhibit one or more cellular processes, and an  
22 antitoxin. The antitoxin forms a complex with the toxin and suppresses the lethality of the  
23 toxin. Prokaryotic DNA sequence database mining showed that TAs are abundant in  
24 bacterial and archaeal chromosomes often in surprisingly high numbers (Anantharaman and  
25 Aravind 2003, Pandey and Gerdes 2005, Shao, et al. 2011). Based on the gene products,  
26 either RNA or protein, TAs are divided into 5 types (Goeders and Van Melderen 2014) of  
27 which Type II are the most predominant and well characterized. Type II TAs encode two  
28 proteins referred to as toxin and antitoxin. They are the most predominantly encoded type  
29 by bacterial genomes and plasmids. The toxin has the potential to inactivate vital cellular  
30 targets while the antitoxin has the potential to sequester toxins off the cellular targets by  
31 forming a toxin-antitoxin complex. Toxins and antitoxins also have the autoregulatory  
32 function wherein the TA complex binds to the operator present upstream of the TA operon  
33 and results in repression. The antitoxin is highly unstable and its relative concentration plays  
34 a critical role in transcriptional autoregulation as well as regulation of toxin activity. The  
35 decrease in antitoxin concentration is a prerequisite for transcriptional activation of TAs. The  
36 significance of TAs multiplicity on prokaryotic genomes and their physiological role is  
37 highly debated. Many plasmids also encode TAs whose gene products have the ability to  
38 inhibit the growth of the cells cured of TA-encoding plasmids and thereby increase the  
39 population of plasmid-containing cells (Gerdes, et al. 1986). Chromosomal TAs were  
40 discovered in studies dealing with stringent response and persistence. Stringent response, a  
41 response elicited in cells under amino acid starvation, is characterized by accumulation of  
42 ppGpp alarmone catalyzed by RelA upon stimulation by uncharged tRNA at the ribosomal  
43 A site (Cashel, et al. 1996, Haseltine and Block 1973, Lund and Kjeldgaard 1972,  
44 Wendrich, et al. 2002). Accumulation of ppGpp modulates RNA polymerase resulting in  
45 reduction of rRNA synthesis and thus prevents frivolous anabolism (Artsimovitch, et al.  
46 2004, Barker, et al. 2001). Several mutants deficient/altered in stringent response were  
47 shown to be mutants of *relBE*, a TAs encoding an antitoxin (RelB) and a ribosome  
48 dependent endoribonuclease toxin (RelE) (Christensen, et al. 2001, Gotfredsen and Gerdes  
49 1998). Persistence, a phenomenon of non-inheritable antibiotic tolerance, is the second  
50 instance in which genes belonging to the TA family were recognized. Some mutants, high  
51 persister mutants (*hip*), of *Escherichia coli* formed more number of persisters than the wild  
52 type. These *hip* mutations mapped to the *hipA* locus (Moyed and Bertrand 1983) which is

53 now recognized as a genuine TAs encoding HipA toxin and HipB antitoxin (Germain, et al.  
54 2013, Kaspy, et al. 2013, Korch, et al. 2003). A recent study shows an attractive link  
55 between TAs, stringent response and persistence; ppGpp, through inorganic polyphosphate  
56 (polyP), activates TAs resulting in induction of persistence (Maisonneuve, et al. 2013).  
57 The crucial link between ppGpp and TA-mediated persistence is the essentiality of polyP  
58 for the degradation of antitoxins. During stringent response, polyP accumulates due to  
59 ppGpp-mediated inhibition of exopolyphosphatase (PpX) (Kuroda, et al. 1997). The presence  
60 or absence of polyP determines the substrate specificity of Lon protease (Kuroda, et al.  
61 2001). Maisonneuve et al., 2013 have shown that polyP is essential for Lon-dependent  
62 degradation of YefM and RelB antitoxins resulting in increased persistence. YefM is the  
63 antitoxin encoded by *yefM/yoeB* TAs, a well-characterized Type II TAs. YoeB, the toxin, is  
64 a ribosome-dependent endoribonuclease (Christensen-Dalsgaard and Gerdes 2008, Feng, et  
65 al. 2013) that cleaves mRNA. YefM forms a complex with YoeB resulting in inhibition of  
66 endoribonuclease activity of YoeB (Cherny, et al. 2005, Kamada and Hanaoka 2005) and  
67 also in mediating transcriptional autorepression (Kedzierska, et al. 2007). However, earlier  
68 studies indicate that transcriptional regulation of TAs, like *relBE* and *mazEF* systems, is  
69 independent of ppGpp (Christensen, et al. 2001, Christensen, et al. 2003) and likely of  
70 polyP as well. Hence, in this study we analyzed the essentiality of polyP in degradation of  
71 YefM antitoxin by studying the promoter activity of *yefM/yoeB* loci and endoribonuclease  
72 activity of chromosomally encoded YoeB.

73

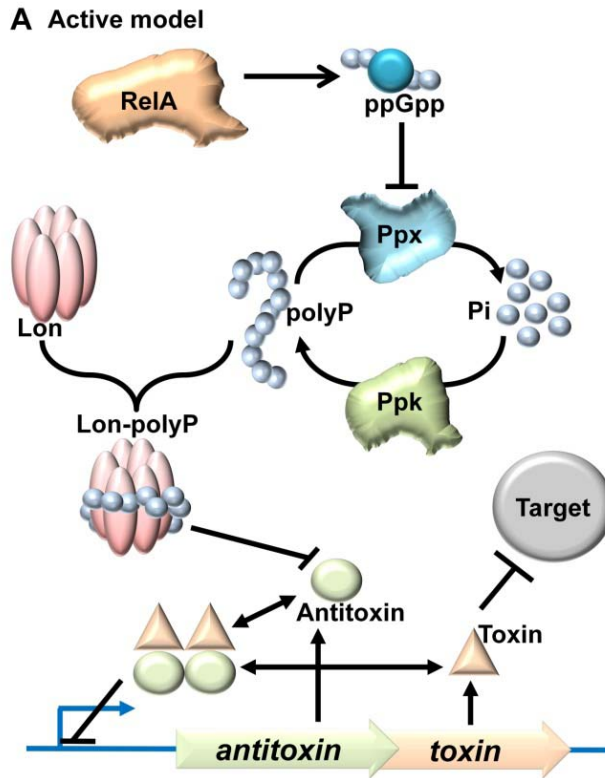

**Figure 1. Active model of TAs regulation.** RelA, when activated stochastically or during amino acid starvation, synthesizes the ppGpp. Accumulation of ppGpp inhibits the degradation of polyP into inorganic phosphate. Hence, due to continual synthesis by Ppk, polyP accumulates in the cell. PolyP then modulates the substrate specificity of Lon protease, specifically targeting antitoxin proteins for degradation. This is hypothesized to render the toxin free to act on its target and confer persistence.

74

75

76 Complex regulatory mechanisms for TAs activation and numerous physiological roles for  
77 chromosomal TAs were proposed by different groups. The most recent report is that TAs  
78 are involved in persistence and that ten different TAs are regulated by ppGpp via polyP  
79 modulated Lon dependent cleavage of antitoxins {Maisonneuve, 2013 #8157}. The  
80 autoregulatory bicistronic circuitry of Type II TA loci is primarily dependent on the  
81 concentration of antitoxin as it regulates the transcription and also the phenotypic  
82 manifestation of the toxins. During stress conditions the antitoxin levels reduce which  
83 could either be due to decrease in the production of antitoxin and/or increase in the  
84 degradation of antitoxin. ‘Passive’ and ‘Active’ models were described to explain the  
85 possible mechanisms in the reduction of antitoxin concentration (Gerdes, et al. 2005). In the  
86 “passive model,” the reduction in antitoxin concentration is due to the inhibition of  
87 translation while in the “active model” it is due to enhanced proteolysis of antitoxin. In the  
88 active model the antitoxins are hypothesized to be specifically targeted for degradation by  
89 its cognate protease. It was speculated that polyP has a role in the active regulation of TAs,  
90 by acting as a Lon stimulant to specifically degrade antitoxins (Gerdes, et al. 2005). In a

91 recent report it was shown that *yefM/yoeB* and *relBE* systems are under the “active” control  
92 of ppGpp through polyP (Maisonneuve, et al. 2013).

93

#### 94 **RESULTS**

95 The transcriptional upregulation of *yefM/yoeB* loci, or any typical TAs, is inversely  
96 proportional to the relative concentration of YefM. This is because TA proteins autoregulate  
97 their promoter/operator; at higher antitoxin concentration the promoter repression is more and  
98 vice versa. Hence any transcriptional activation from *yefM/yoeB* operon indicates a decrease  
99 in antitoxin concentration which could be a result of either increased proteolysis or decreased  
100 translation of YefM. Therefore, quantification of the TA mRNA is a good indicator of  
101 antitoxin concentration in the cell. To test the essentiality of polyP in Lon-dependent  
102 degradation of YefM in vivo, we employed semi-quantitative primer extension (Christensen,  
103 et al. 2001, Christensen, et al. 2003) of YefM mRNA. This assay has the advantage of a  
104 holistic transcriptional regulatory scenario of TAs without employing any genetic  
105 manipulations within the TA circuitry, thus avoiding artifacts.

106

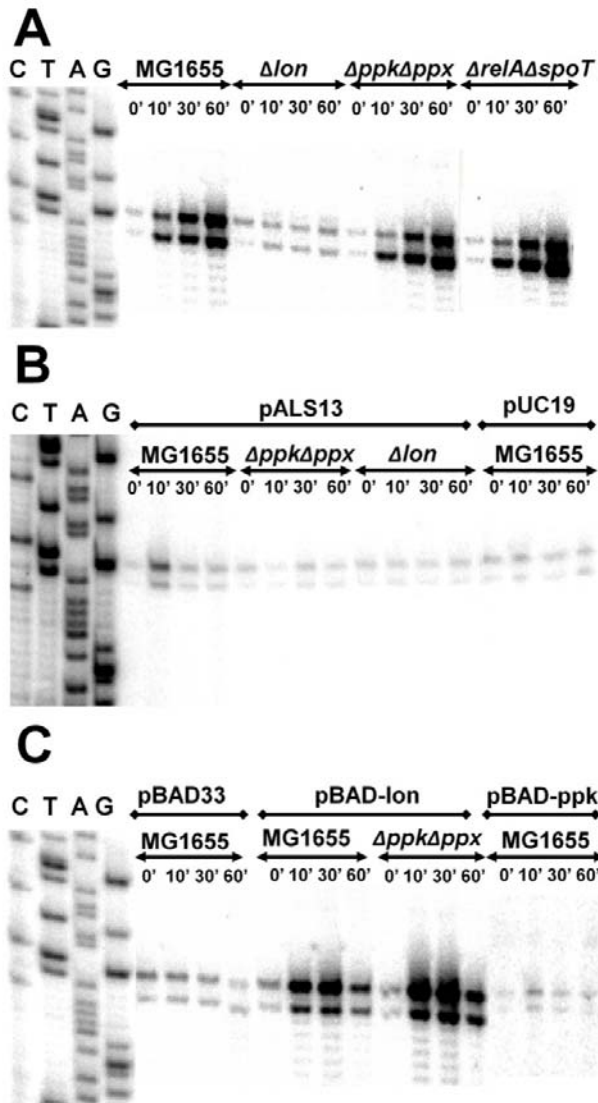

**Figure 2: Transcriptional upregulation of *yefM/yoeB* loci is independent of polyP: (A)**

Exponentially growing (0.45 of OD<sub>450</sub>) cultures of MG1655, Δlon, ΔppkΔppx and ΔrelAΔspoT were treated with 1 mg/ml of serine hydroxymate. Total RNA was isolated at 0, 10, 30 and 60 minutes and semi-quantitative primer extension was performed using YefM mRNA-specific primer (YefMPE-2). (B) pALS13 plasmid, containing truncated *relA* gene downstream of the *lac* promoter, was transformed into MG1655, Δlon and ΔppkΔppx strains. All the strains were grown to exponential phase and *relA'* was overexpressed using 1 mM Isopropyl β-D-1-thiogalactopyranoside (IPTG). Total RNA was purified from samples taken at 0, 10, 30 and 60 minutes after addition of IPTG. Primer extension was performed as in (A). (C) MG1655 strain was transformed with pBAD33 or pBAD-*lon* or pBAD-*ppk* plasmids and ΔppkΔppx strain was transformed with pBAD-*lon*. Overnight cultures were diluted and grown to 0.45 OD<sub>450</sub> in LB medium supplemented with glycerol as carbon source at 37 °C. 0.2% arabinose was added to induce overexpression of *lon* or *ppk*. Samples were collected at different intervals and semi-quantitative primer extension performed as in (B).

107 **polyP is not required for upregulation of *yefM/yoeB* loci during amino acid starvation.**

108 To test the role of ppGpp and polyP in the regulation of *yefM/yoeB* system, we performed  
 109 amino acid starvation experiments using serine hydroxymate (SHX) and analyzed the  
 110 transcription of *yefM/yoeB* loci using semi-quantitative primer extension using a YefM  
 111 mRNA-specific primer. Exponentially growing *E. coli* strains MG1655 (Wild type), Δlon,  
 112 ΔppkΔppx and ΔrelAΔspoT, were treated with 1 mg/mL of SHX to induce serine starvation.  
 113 ΔppkΔppx and ΔrelAΔspoT strains are deficient in accumulating polyP and ppGpp,

114 respectively (Crooke, et al. 1994, Xiao, et al. 1991). In the wild type (WT) strain, we found a  
115 dramatic increase (16 fold) in the transcription of *yefM/yoeB* loci while in  $\Delta lon$  strain there  
116 was no change (Figure 2A). Interestingly and importantly, we found an increase in  
117 transcription of *yefM/yoeB* loci in  $\Delta ppk\Delta ppx$  as well as in  $\Delta relA\Delta spoT$  strains, similar to that  
118 of the WT. This observation indicates that *yefM/yoeB* transcriptional control through YefM is  
119 under the control of Lon and is independent of polyP and ppGpp. In fact, earlier studies  
120 reported ppGpp-independent transcriptional upregulation of *relBE* (Christensen, et al. 2001)  
121 and *mazEF* systems (Christensen, et al. 2003) during SHX-induced starvation experiments.

122

123

124 **Lon protease-induced transcriptional upregulation of *yefM/yoeB* is independent of**  
125 **polyP.**

126 To further analyze the role of ppGpp and polyP in *yefM/yoeB* regulation we used ectopic  
127 overexpression of *relA'* (Svitil, et al. 1993), which encodes a truncated RelA capable of  
128 ribosome-independent synthesis of ppGpp, in different strains. WT,  $\Delta ppk\Delta ppx$  and  $\Delta lon$   
129 strains, transformed with pALS13 (Svitil, et al. 1993), were grown to mid log phase and the  
130 expression of *relA'* was induced by the addition of IPTG. In our primer extension analysis of  
131 *yefM/yoeB* transcription, we found that there was transient increase (7 fold) in the  
132 transcription during the first 10 minutes but decreased back to basal levels. However, in  
133  $\Delta ppk\Delta ppx$  and  $\Delta lon$  strains, there was no change over a time period of 60 minutes (Figure  
134 2B). This indicates that there is a polyP-dependent transient increase in *yefM/yoeB*  
135 transcription upon overproduction of ppGpp during the exponential growth phase. We also  
136 carried out overexpression of Lon protease in MG1655 and  $\Delta ppk\Delta ppx$  strains to check if  
137 polyP has a role in the regulation of *yefM/yoeB* system and found that transcription of  
138 *yefM/yoeB* increased similarly in both MG1655 and  $\Delta ppk\Delta ppx$  strains (Figure 2C). Similarly,  
139 upon ectopic overexpression of *ppk* we found a transient and marginal increase in  
140 transcription from *yefM/yoeB* loci in samples taken at 10 minutes but reduced back to basal  
141 levels by 30 minutes.



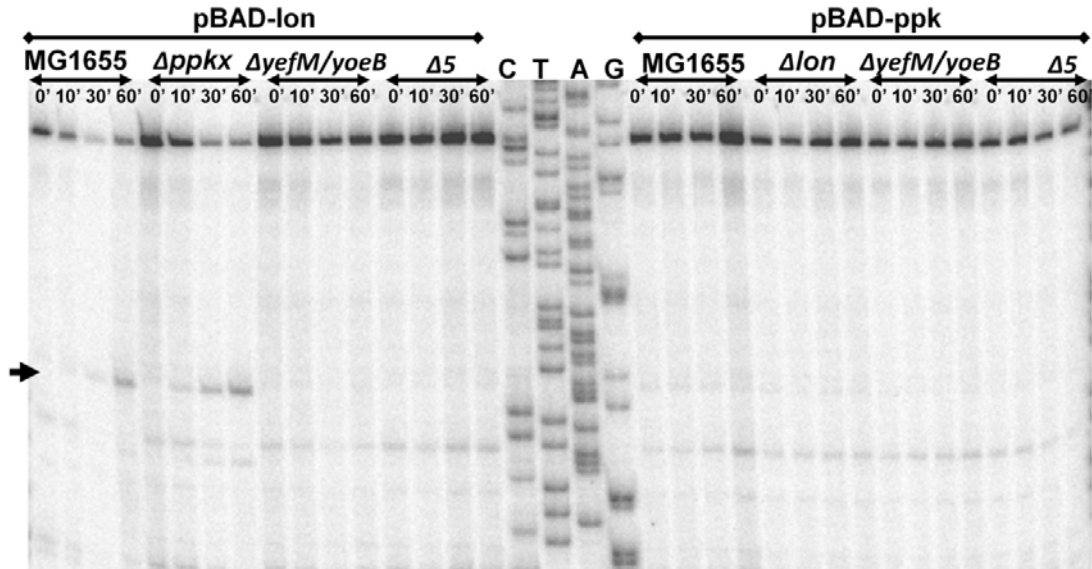

**Figure 3. YoeB-dependent cleavage upon overexpression of *lon* is independent of polyP.** MG1655,  $\Delta ppk\Delta ppk$  ( $\Delta ppkx$ ),  $\Delta yefM/yoeB$  and  $\Delta 5$  strains were transformed with pBAD-*lon* and pBAD-*ppk* was transformed into MG1655,  $\Delta lon$ ,  $\Delta yefM/yoeB$  and  $\Delta 5$ . The transformants were grown in LB media, supplemented with 2% glycerol, to mid-exponential phase (0.45 of OD<sub>450</sub>) and 0.2% arabinose was added to induce expression of *lon* or *ppk*. Samples were collected at 0, 10, 30 and 60 minutes and primer extension was carried out using Lpp mRNA-specific primer (lpp21) for cleavage site mapping. YoeB-dependent cleavage, indicated by an arrow, is in accordance with results from Christensen, *et al*, 2004.

142 **YoeB-mediated cleavage of mRNA upon overexpression of Lon is independent of polyP.**

143 Transcriptional upregulation of *yefM/yoeB* operon does not necessarily mean that YoeB is  
144 free to cleave its target mRNA. To date, chromosomal YoeB-dependent mRNA cleavage has  
145 been observed only upon ectopic overproduction of Lon protease (Christensen, et al. 2004).  
146 The ectopic overexpression of Lon degrades YefM, leaving YoeB free to manifest its  
147 endoribonuclease activity. Since it was shown that Lon-mediated degradation of YefM is  
148 dependent on polyP (Maisonneuve, et al. 2013), it is interesting to see if polyP is essential to  
149 render YoeB free by promoting the degradation of YefM. First, we overexpressed Lon  
150 protease in WT,  $\Delta ppk\Delta ppk$ ,  $\Delta yefM/yoeB$  (MG1655 derivative with *yefM/yoeB* deletion) and  $\Delta 5$   
151 (MG1655 derivative in which 5 TAs are deleted) strains and mapped for cleavage sites in Lpp  
152 mRNA by primer extension as reported in earlier studies (Christensen, et al. 2004). We found  
153 that Lpp mRNA is cleaved at the second codon of AAA site in WT and  $\Delta ppk\Delta ppk$  strains but  
154 not in  $\Delta yefM/yoeB$  and  $\Delta 5$  strains (Figure 3). As evident from Figure 2C, there was a  
155 transient upregulation of *yefM/yoeB* transcription upon overexpression of *ppk* and *relA*.  
156 Hence, we overexpressed *ppk* in exponentially growing cultures of WT,  $\Delta lon$ ,  $\Delta yefM/yoeB$   
157 and  $\Delta 5$  strains. We could not detect any YoeB-dependent cleavage of Lpp mRNA upon  
158 ectopic overexpression of *ppk* in any of the strains. These results indicate that polyP is not

159 required to render YoeB free of YefM to manifest YoeB dependent cleavage during Lon  
160 overproduction.

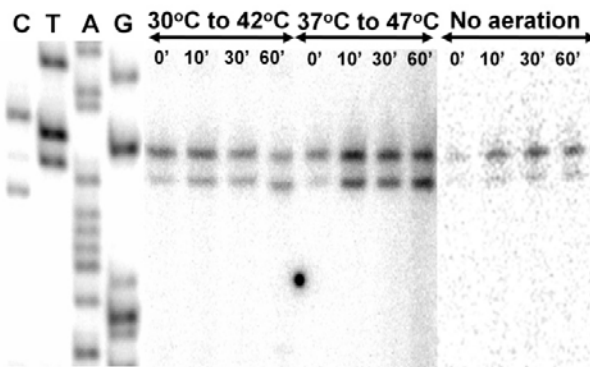

**Figure 4: Effect of heat shock on the transcription of *yefM/yeoB* loci.** Exponentially growing MG1655 cultures (0.45 of OD<sub>450</sub>) were moved from 30°C to 42°C, or 37°C to 47°C or aerated to unaerated conditions. Samples for RNA purification were collected at time 0, 10, 30 and 60 minutes after stress induction. Primer extension was performed on 10µg of each RNA sample using YefM mRNA-specific primer (YefMPE-2). The experiment labelled “no aeration” was conducted independently at a different time.

161 **Increase in the rate of transcription of *yefM/yeoB* loci upon heat shock.**

162 Several descriptions of TA regulations assumed TA loci to be bistable, either ON or OFF.  
163 This notion is strengthened by experiments in which starvation is drastic and near absolute  
164 which results in increased rates of TA transcription (Christensen, et al. 2001, Maisonneuve, et  
165 al. 2011). We hypothesized that TA regulation is rather “analogue” and not “discrete”,  
166 meaning that the degree of repression varies as a function of global translation and/or  
167 proteolysis rates. We performed heat shock experiments and oxygen deprivation experiments  
168 to mimic suboptimal conditions which could affect translation rates. Heat shock experiments  
169 were performed from 30°C to 42°C and 37°C to 47°C. In the 30°C to 42°C heat shock  
170 experiment, we did not notice any significant difference in the transcriptional rates of TAs.  
171 However in the 37°C to 47°C heat shock experiment, we noticed a stable threefold increase in  
172 the rate of transcription which was maintained through the 120 minutes of analysis (Figure  
173 4). We performed an experiment in which cultures were deprived of oxygen by placing the  
174 cultures at 37°C in the incubator without shaking. Similar to the results in the 37°C to 47°C  
175 heat shock experiment, we observed that the *yefM/yeoB* transcript is consistently upregulated  
176 upon partial anaerobiosis (Figure 4). In fact, similar stable maintenance of increased  
177 transcription was also observed in *relBE* system upon induction of heat shock and glucose  
178 starvation (Christensen, et al. 2001).

179

180 **DISCUSSION**

181 **PolyP is not essential for the transcriptional activation of *yefM/yoeB* loci and**  
182 **endoribonuclease activity of YoeB.**

183 In our amino acid starvation experiments, we found a consistent increase in transcription of  
184 *yefM/yoeB* operon in *AppkAppx* and *ΔrelAΔspoT* strains, strains deficient in accumulation of  
185 polyP and ppGpp respectively, similar to that of wild type (Fig 1A). In contrast to the reports  
186 of Maisonneuve et al., 2013, our semi-quantitative primer extension experiments show that  
187 neither ppGpp nor polyP is required for the transcriptional upregulation of *yefM/yoeB* loci.  
188 This indirectly indicates that ppGpp or polyP is not required for YefM degradation during  
189 amino acid starvation. Our results corroborate the earlier findings that *relBE* (Christensen, et  
190 al. 2001) and *mazEF* systems (Christensen, et al. 2003) transcriptional upregulation of during  
191 SHX-induced starvation is independent of ppGpp but dependent on Lon protease. RelA  
192 dependent accumulation of ppGpp was shown to be inhibited by chloramphenicol treatment  
193 (Svitil, et al. 1993) and yet the *relBE* and *mazEF* TAs were shown to be upregulated upon  
194 addition of chloramphenicol (Christensen, et al. 2001, Christensen, et al. 2003). When we  
195 overexpressed Lon protease in MG1655 and *AppkAppx*, there was a dramatic and consistent  
196 increase in transcription from *yefM/yoeB* loci (Fig 1C) in both the strains indicating that  
197 polyP is not required for degradation of YefM. In our overexpression experiments, we found  
198 a transient increase in transcription from *yefM/yoeB* operon upon overproduction of *relA*  
199 (Figure 2B) and *ppk* (Figure 2C) which could be due to metabolic burden of over-producing  
200 proteins. There is also a possibility that ppGpp production and/or polyP accumulation could  
201 affect the translational apparatus as in polyP-dependent Lon-mediated proteolysis (Kuroda, et  
202 al. 2001) of ribosomal proteins and hence the transient increase in *yefM/yoeB* transcription  
203 was observed. Previously, Lpp and tmRNA were shown to be cleaved by chromosomally  
204 encoded YoeB upon overproduction of Lon protease (Christensen, et al. 2004). We  
205 performed similar experiments to test the role of polyP in manifestation of YoeB-dependent  
206 endoribonuclease activity. We observed YoeB-dependent cleavage of Lpp mRNA, upon Lon  
207 overexpression, in MG1655 as well as in *AppkAppx* strains but not in *ΔyefM/yoeB* and *Δ5*  
208 (Fig 2). This implies that YoeB-specific cleavage is independent of polyP—meaning that  
209 activation of YoeB, by degradation of YefM, is independent of polyP. Furthermore,  
210 overexpression of *ppk* did not induce any YoeB-mediated cleavage in any of the strains.  
211 Hence, our results establish that polyP is not required for the transcriptional activation of  
212 *yefM/yoeB* loci and endoribonuclease activity of YoeB which imply that polyP is not required  
213 for Lon-mediated degradation of YefM. Within the scope of the experiments it can be argued  
214 that translation and Lon protease are the regulators of YefM concentration.

215

## 216 **Is polyP required for antitoxin degradation?**

217 Reduction in persisters was also observed upon *relA* overexpression in  $\Delta 10$  and *AppkAppx*  
218 strains prompting Maisonneuve et al., 2013 to assume that degradation of the other antitoxins  
219 in *E. coli* (ChpS, DinJ, MazE, MqsA, HicB, PrlF, YafN, HigA) was also dependent on polyP  
220 (Maisonneuve, et al. 2013). It is known that most of the antitoxins are loosely folded or  
221 natively unfolded (Cherny and Gazit 2004, Nieto, et al. 2007) and is probably the reason for  
222 high turnover rates of antitoxins. The half-life of free native YefM in *E. coli* MC4100 strain  
223 was about 48 minutes (Cherny, et al. 2005) while that of his-tagged YefM, in MG1655, is  
224 about 11 minutes (Maisonneuve, et al. 2013). The difference in these values could be  
225 attributed to differences in the genetic background of the strains as well as artificially  
226 induced primary structural modifications in YefM. It is to be noted that YefM is degraded  
227 (Cherny, et al. 2005) even in MC4100 strain (*relA1* mutant strain) which is deficient in  
228 accumulating ppGpp during amino acid starvation (Metzger, et al. 1989). It may be noted  
229 that antitoxins like YafN, HigA and YgiT were shown to be degraded by both Lon and Clp  
230 proteases (Christensen-Dalsgaard, et al. 2010). Furthermore, based on studies on “delayed  
231 relaxed response” (Christensen and Gerdes 2004), the half-life of RelB in MC1000 strain is  
232 approximately 15 minutes and RelB101 (A39T mutant of RelB) is less than 5 minutes. It is  
233 interesting to notice that RelB101 is degraded even in a  $\Delta lon$  strain, indicating that some  
234 other proteases may also cleave RelB101 (Christensen and Gerdes 2004). This literature  
235 evidence indicates that changes in primary structures of antitoxins could drastically alter their  
236 stabilities and protease susceptibility. Maisonneuve et al., 2013 did not provide accurate half-  
237 life of YefM in *AppkAppx* strain (Maisonneuve, et al. 2013) to ascertain if there is any  
238 degradation at all. The “polyP-dependent active TA regulation model” (Maisonneuve, et al.  
239 2013) fails to explain how all the ten significantly divergent antitoxins of *E. coli* MG1655  
240 could be substrates of ‘polyP-modulated Lon’ protease. The requirement of polyP for Lon-  
241 mediated degradation of antitoxins does not seem to be a general phenomenon unless ‘native  
242 unfoldedness’ and/or nucleic acid binding motif (the two important features of antitoxins) of  
243 the substrate protein determine it. Moreover, the molecular mechanisms of Lon substrate  
244 specificity modulation by polyP are not yet fully understood. It is not yet clear if a specific  
245 motif or tertiary structure of the substrate protein determines polyP-Lon dependent  
246 proteolysis. PolyP was shown to inhibit Lon protease *in vitro* (Osbourne, et al. 2014) and is  
247 implicated in acting as a chaperone for unfolded proteins (Kampinga 2014) which may have  
248 significant implications in bacterial stress physiology. To our rationale, since TAs propagate

249 through horizontal gene transfer mechanisms, minimal dependence on host genetic elements  
250 maybe preferable for regulation. Within the scope of our experiments conducted in this study  
251 and based on evidence in literature, it is appropriate to state that polyP is not essential for  
252 Lon-mediated proteolysis of YefM. Although we do not have a ready explanation for this  
253 fundamental contradiction, we do not rule out His-tag interference in the proteolysis assays  
254 used by Maisonneuve et al., 2013.

### 255 **Dynamic model of TAs**

256 Our experiments (Figure 2, 3) rule out the essentiality of ppGpp and polyP in the  
257 transcriptional regulation of *yefM/yoeB* loci and also in the active model. Our results largely  
258 reiterate the so called “passive model” (Gerdes, et al. 2005, Sat, et al. 2001) which we refer to  
259 as “dynamic model”. In the dynamic model, production by translation and continuous  
260 degradation by protease contribute to high turnover rates of antitoxins. It is assumed that  
261 degradation by protease is relatively constant and the production of antitoxin is highly  
262 variable according to the growth conditions that influence translation. Regulation of TAs is  
263 not just the discrete ‘ON’ or ‘OFF’ states at the transcriptional level but rather a function of  
264 the continuous variable “antitoxin concentration”. Same bacteria in different conditions will  
265 have different levels of antitoxin which could reflect in the transcriptional up/down regulation  
266 of the corresponding TA operon. This could be a sensory mechanism for the TAs to detect  
267 the nature of the growth conditions and thus modulate its regulation. The key to the  
268 dynamicity of the TA regulatory system is the continuous degradation of antitoxin likely by  
269 virtue of the loose conformation of the antitoxin, a characteristic feature of most Type II  
270 antitoxins. Since translational inhibition precedes proteolysis during conditions like amino  
271 acid starvation, it would be rational for TAs to be responsive to translational inhibition rather  
272 than the proteolysis of antitoxin. Towards establishing non-discrete nature of the TA operon  
273 regulation we performed heat shock and oxygen deprivation experiments (Figure 4).  
274 Interestingly, we found that at 47 °C and O<sub>2</sub> deprivation there is a consistent threefold  
275 increase in the transcription rate of *yefM/yoeB* loci indicating that the regulation of *yefM/yoeB*  
276 is not just an ON or OFF but has intermediate states. Heat shock response alleviates the  
277 effects and burden of non-productive proteome of the cell by production of more chaperones  
278 and proteases including Lon. Although it is beyond the scope of the experiment to pinpoint  
279 the cause, it is likely that the increased rate of transcription is due to higher turnover rate of  
280 YefM due to structural changes in the cell. Experiments involving drastic and instantaneous  
281 inhibition of translation, like treatment with high doses of SHX or Chloramphenicol, the  
282 antitoxins are almost completely degraded and hence we observe a dramatic increase in



283 transcription over time. As opposed to starvation experiments in which TA mRNA seems to  
 284 accumulate over time, stable maintenance of transcriptional upregulation indicates that the  
 285 operator is partially or intermittently repressed. In fact, similar stable maintenance of  
 286 increased transcription was also observed in *relBE* system upon induction of heat shock and  
 287 glucose starvation (Christensen, et al. 2001). Stresses like heat shock, anaerobic conditions  
 288 and glucose starvation reduce productive translation which could reflect in lower rates of  
 289 antitoxin production. This leads to lesser probability for the formation of TA complexes  
 290 capable of autorepression. Hence an increased transcription rate is maintained from the TA  
 291 loci and is a function of the new equilibrium of translation and proteolysis rates of antitoxin.  
 292 This dynamic nature of TA regulation allows sensing the global translation rate which usually  
 293 indicates the nature of the growth conditions and available nutrient resources.

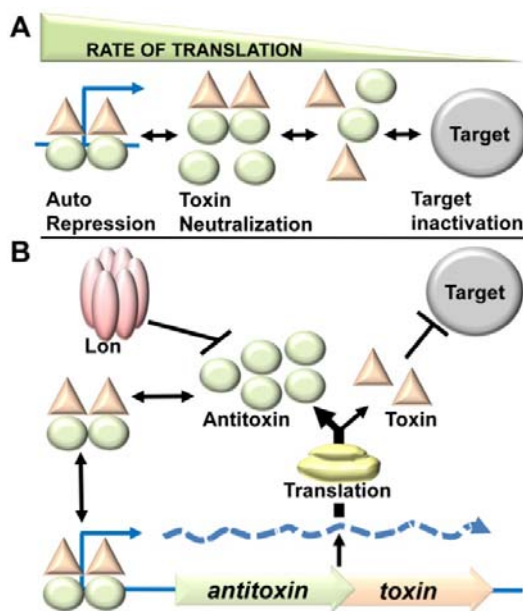

**Figure 5. (A). Interactions and action of toxin antitoxin proteins.** Based on the concentrations of antitoxin and toxin proteins the equilibrium shuttles between auto repression or target inactivation. The concentration of TA proteins is a function of rate of translation, assuming constant or negligible variation in the rate of antitoxin proteolysis by Lon. At very high translation rates the formation of repressive TA complexes results in repression of TA transcription. As the translation rate reduces the equilibrium shifts towards target inactivation.

**(B) The dynamic regulatory circuit of Type II TA systems.** In all conditions, the rate of degradation is constant or negligibly variable. At higher translation rates more antitoxin proteins are produced per TA mRNA. The formed TA proteins form a complex in conditions of high translation rate which binds to the operator of TA operons and represses it.

294 Interestingly, in the abstract of a recent report (Germain, et al. 2015) a statement was made;  
 295 “Polyphosphate activated Lon to degrade all known type II antitoxins of *E. coli*.” Firstly,  
 296 there is no evidence ever provided that ‘all known antitoxins’ were degraded by polyP  
 297 modulated Lon in any report and moreover such observation is questionable. The results  
 298 presented in our report and the exhaustive literature survey conclusively refute the  
 299 essentiality of ppGpp and polyP in the regulation of *yefM/yoeB* and likely other similarly  
 300 working TAs.

301 **MATERIAL AND METHODS**

| Strain                  | Genotype                                                                                                                                                                 | Source                                       |
|-------------------------|--------------------------------------------------------------------------------------------------------------------------------------------------------------------------|----------------------------------------------|
| MG1655                  | <i>E. coli</i> K-12                                                                                                                                                      | Lab collection<br>(Christensen, et al. 2004) |
| SC36                    | MG1655 $\Delta yefM/yoeB$                                                                                                                                                | (Christensen <i>et al</i> , 2004)            |
| SC301467 ( $\Delta 5$ ) | MG1655 $\Delta relBE \Delta mazF \Delta dinJ yafQ$<br>$\Delta yefM/yoeB \Delta chpB$                                                                                     | (Christensen <i>et al</i> , 2004)            |
| CF1693                  | MG1655 $\Delta relA251::kan \Delta spoT207::cam$                                                                                                                         | (Xiao, et al. 1991)                          |
| CF5802                  | MG1655 $\Delta ppk-ppk::kan$                                                                                                                                             | (Kuroda, et al. 1997)                        |
| $\Delta lon$            | MG1655 $\Delta lon$                                                                                                                                                      | (Winther and Gerdes<br>2009)                 |
| $\Delta 10$             | (MG1655 $\Delta mazF \Delta chpB \Delta relBE \Delta (dinJ-$<br>$yafQ) \Delta (yefM-yoeB) \Delta higBA \Delta (prlF-yhaV)$<br>$\Delta yafNO \Delta mqsRA \Delta hicAB$ ) | (Maisonneuve, et al.<br>2011)                |
|                         |                                                                                                                                                                          |                                              |

302

| Plasmid          |                                                        | Source                                 |
|------------------|--------------------------------------------------------|----------------------------------------|
| pBAD33           |                                                        | (Guzman, et al. 1995)                  |
| pBAD- <i>lon</i> |                                                        | (Christensen, et al. 2004)             |
| pBAD- <i>ppk</i> |                                                        | Mikkel Girke Jorgensen,<br>unpublished |
| pALS13           | AmpR/ Ptac - <i>relA'</i> (RelA 1-455), active<br>RelA | (Svitil, et al. 1993)                  |
| pUC18            |                                                        |                                        |

303

304 **Growth conditions and media used.**

305 All the experiments involving primer extension were grown in Luria Bertani broth, at 37  
306 °C, with 180 rpm shaking in a water bath unless specified otherwise.

307 Primer extension

308 Samples of 25 mL experimental cultures were collected at 0, 10, 30 and 60 minutes and  
309 cells were harvested by centrifugation at 4°C. Total RNA was isolated using hot phenol  
310 method and quality was analyzed by agarose gel electrophoresis. Total RNA in each sample  
311 was set to about 5 µg/µL. p32 labelled primers, YefMPE-2 (5'-

312 GGCTTTCATCATTGTTGCCG-3') and lpp21 (5'-  
313 CTGAACGTCAGAAGACAGCTGATCG-3'), were used in primer extension experiments  
314 involving *yefM/yoeB* promoter activity and YoeB-dependent mRNA cleavage site mapping  
315 respectively. Reverse transcription was carried out on 10 µg of total RNA, purified from  
316 samples at designated time points, using AMV-reverse transcriptase. Sequencing reactions  
317 were carried out similarly with Sanger's dideoxynucleotide method.

318 Antibiotic sensitivity assay:

319 Conventional disc diffusion method was used to measure the relative sensitivity of the strains.  
320 100 µL of diluted (100-fold) overnight cultures were spread on LB agar (height – 5 mm) in  
321 plates with diameter 9.5 cm. Premade antibiotic discs with defined concentrations (purchased  
322 from HiMedia™) were placed on the agar plates after 20 minutes. The plates were incubated  
323 overnight at 37 °C. Diameters of the zones of inhibition were measured and the graph was  
324 plotted.

325

### 326 **ACKNOWLEDGEMENT:**

327 The author thanks Prof. Kenn Gerdes for the support during this work at BMB, University of  
328 Southern Denmark.

329

### 330 **REFERENCES**

- 331 Anantharaman V, Aravind L. New connections in the prokaryotic toxin-antitoxin network:  
332 relationship with the eukaryotic nonsense-mediated RNA decay system. *Genome Biol*  
333 2003;**4**: R81.
- 334 Artsimovitch I, Patlan V, Sekine S *et al.* Structural basis for transcription regulation by alarmone  
335 ppGpp. *Cell* 2004;**117**: 299-310.
- 336 Barker MM, Gaal T, Josaitis CA *et al.* Mechanism of regulation of transcription initiation by ppGpp. I.  
337 Effects of ppGpp on transcription initiation in vivo and in vitro. *J Mol Biol* 2001;**305**: 673-88.
- 338 Cashel M, Gentry DR, Hernandez VJ *et al.* *The stringent response*. *Escherichia coli and Salmonella*:  
339 cellular and molecular biology: 2 Edition. Washington, DC: American  
340 Society for Microbiology Press, 1996.
- 341 Cherny I, Gazit E. The YefM antitoxin defines a family of natively unfolded proteins: implications as a  
342 novel antibacterial target. *J Biol Chem* 2004;**279**: 8252-61.
- 343 Cherny I, Rockah L, Gazit E. The YoeB toxin is a folded protein that forms a physical complex with the  
344 unfolded YefM antitoxin. Implications for a structural-based differential stability of toxin-  
345 antitoxin systems. *J Biol Chem* 2005;**280**: 30063-72.
- 346 Christensen-Dalsgaard M, Gerdes K. Translation affects YoeB and MazF messenger RNA interferase  
347 activities by different mechanisms. *Nucleic Acids Res* 2008;**36**: 6472-81.
- 348 Christensen-Dalsgaard M, Jorgensen MG, Gerdes K. Three new RelE-homologous mRNA interferases  
349 of *Escherichia coli* differentially induced by environmental stresses. *Mol Microbiol* 2010;**75**:  
350 333-48.



- 351 Christensen SK, Gerdes K. Delayed-relaxed response explained by hyperactivation of RelE. *Mol*  
352 *Microbiol* 2004;**53**: 587-97.
- 353 Christensen SK, Maenhaut-Michel G, Mine N *et al.* Overproduction of the Lon protease triggers  
354 inhibition of translation in *Escherichia coli*: involvement of the *yefM-yoeB* toxin-antitoxin  
355 system. *Mol Microbiol* 2004;**51**: 1705-17.
- 356 Christensen SK, Mikkelsen M, Pedersen K *et al.* RelE, a global inhibitor of translation, is activated  
357 during nutritional stress. *Proc Natl Acad Sci U S A* 2001;**98**: 14328-33.
- 358 Christensen SK, Pedersen K, Hansen FG *et al.* Toxin-antitoxin loci as stress-response-elements:  
359 ChpAK/MazF and ChpBK cleave translated RNAs and are counteracted by tmRNA. *J Mol Biol*  
360 2003;**332**: 809-19.
- 361 Crooke E, Akiyama M, Rao NN *et al.* Genetically altered levels of inorganic polyphosphate in  
362 *Escherichia coli*. *J Biol Chem* 1994;**269**: 6290-5.
- 363 Feng S, Chen Y, Kamada K *et al.* YoeB-ribosome structure: a canonical RNase that requires the  
364 ribosome for its specific activity. *Nucleic Acids Res* 2013;**41**: 9549-56.
- 365 Gerdes K, Christensen SK, Lobner-Olesen A. Prokaryotic toxin-antitoxin stress response loci. *Nat Rev*  
366 *Microbiol* 2005;**3**: 371-82.
- 367 Gerdes K, Rasmussen PB, Molin S. Unique type of plasmid maintenance function: postsegregational  
368 killing of plasmid-free cells. *Proc Natl Acad Sci U S A* 1986;**83**: 3116-20.
- 369 Germain E, Castro-Roa D, Zenkin N *et al.* Molecular mechanism of bacterial persistence by HipA. *Mol*  
370 *Cell* 2013;**52**: 248-54.
- 371 Germain E, Roghanian M, Gerdes K *et al.* Stochastic induction of persister cells by HipA through  
372 (p)ppGpp-mediated activation of mRNA endonucleases. *Proc Natl Acad Sci U S A* 2015, DOI  
373 10.1073/pnas.1423536112.
- 374 Goeders N, Van Melderen L. Toxin-antitoxin systems as multilevel interaction systems. *Toxins (Basel)*  
375 2014;**6**: 304-24.
- 376 Gotfredsen M, Gerdes K. The *Escherichia coli relBE* genes belong to a new toxin-antitoxin gene  
377 family. *Mol Microbiol* 1998;**29**: 1065-76.
- 378 Guzman LM, Belin D, Carson MJ *et al.* Tight regulation, modulation, and high-level expression by  
379 vectors containing the arabinose pBAD promoter. *J Bacteriol* 1995;**177**: 4121-30.
- 380 Haseltine WA, Block R. Synthesis of guanosine tetra- and pentaphosphate requires the presence of a  
381 codon-specific, uncharged transfer ribonucleic acid in the acceptor site of ribosomes. *Proc*  
382 *Natl Acad Sci U S A* 1973;**70**: 1564-8.
- 383 Kamada K, Hanaoka F. Conformational change in the catalytic site of the ribonuclease YoeB toxin by  
384 YefM antitoxin. *Mol Cell* 2005;**19**: 497-509.
- 385 Kampinga HH. Chaperoned by prebiotic inorganic polyphosphate molecules: an ancient  
386 transcription-independent mechanism to restore protein homeostasis. *Mol Cell* 2014;**53**:  
387 685-7.
- 388 Kaspy I, Rotem E, Weiss N *et al.* HipA-mediated antibiotic persistence via phosphorylation of the  
389 glutamyl-tRNA-synthetase. *Nat Commun* 2013;**4**: 3001.
- 390 Kedzierska B, Lian LY, Hayes F. Toxin-antitoxin regulation: bimodal interaction of YefM-YoeB with  
391 paired DNA palindromes exerts transcriptional autorepression. *Nucleic Acids Res* 2007;**35**:  
392 325-39.
- 393 Korch SB, Henderson TA, Hill TM. Characterization of the *hipA7* allele of *Escherichia coli* and evidence  
394 that high persistence is governed by (p)ppGpp synthesis. *Mol Microbiol* 2003;**50**: 1199-213.
- 395 Kuroda A, Murphy H, Cashel M *et al.* Guanosine tetra- and pentaphosphate promote accumulation  
396 of inorganic polyphosphate in *Escherichia coli*. *J Biol Chem* 1997;**272**: 21240-3.
- 397 Kuroda A, Nomura K, Ohtomo R *et al.* Role of inorganic polyphosphate in promoting ribosomal  
398 protein degradation by the Lon protease in *E. coli*. *Science* 2001;**293**: 705-8.
- 399 Lund E, Kjeldgaard NO. Metabolism of guanosine tetraphosphate in *Escherichia coli*. *European*  
400 *journal of biochemistry / FEBS* 1972;**28**: 316-26.

- 401 Maisonneuve E, Castro-Camargo M, Gerdes K. (p)ppGpp controls bacterial persistence by stochastic  
402 induction of toxin-antitoxin activity. *Cell* 2013;**154**: 1140-50.
- 403 Maisonneuve E, Shakespeare LJ, Jorgensen MG *et al.* Bacterial persistence by RNA endonucleases.  
404 *Proc Natl Acad Sci U S A* 2011;**108**: 13206-11.
- 405 Metzger S, Schreiber G, Aizenman E *et al.* Characterization of the *relA1* mutation and a comparison  
406 of *relA1* with new *relA* null alleles in *Escherichia coli*. *J Biol Chem* 1989;**264**: 21146-52.
- 407 Moyed HS, Bertrand KP. *hipA*, a newly recognized gene of *Escherichia coli* K-12 that affects frequency  
408 of persistence after inhibition of murein synthesis. *J Bacteriol* 1983;**155**: 768-75.
- 409 Nieto C, Cherny I, Khoo SK *et al.* The yefM-yoeB toxin-antitoxin systems of *Escherichia coli* and  
410 *Streptococcus pneumoniae*: functional and structural correlation. *J Bacteriol* 2007;**189**:  
411 1266-78.
- 412 Osbourne DO, Soo VW, Konieczny I *et al.* Polyphosphate, cyclic AMP, guanosine tetraphosphate, and  
413 c-di-GMP reduce in vitro Lon activity. *Bioengineered* 2014;**5**: 457-61.
- 414 Pandey DP, Gerdes K. Toxin-antitoxin loci are highly abundant in free-living but lost from host-  
415 associated prokaryotes. *Nucleic Acids Res* 2005;**33**: 966-76.
- 416 Sat B, Hazan R, Fisher T *et al.* Programmed cell death in *Escherichia coli*: some antibiotics can trigger  
417 *mazEF* lethality. *J Bacteriol* 2001;**183**: 2041-5.
- 418 Shao Y, Harrison EM, Bi D *et al.* TADB: a web-based resource for Type 2 toxin-antitoxin loci in  
419 bacteria and archaea. *Nucleic Acids Res* 2011;**39**: D606-11.
- 420 Svitil AL, Cashel M, Zyskind JW. Guanosine tetraphosphate inhibits protein synthesis in vivo. A  
421 possible protective mechanism for starvation stress in *Escherichia coli*. *J Biol Chem* 1993;**268**:  
422 2307-11.
- 423 Wendrich TM, Blaha G, Wilson DN *et al.* Dissection of the mechanism for the stringent factor RelA.  
424 *Mol Cell* 2002;**10**: 779-88.
- 425 Winther KS, Gerdes K. Ectopic Production of VapCs from Enterobacteria inhibits translation and  
426 trans-activates YoeB mRNA Interferase. *Mol Microbiol* 2009.
- 427 Xiao H, Kalman M, Ikehara K *et al.* Residual guanosine 3',5'-bispyrophosphate synthetic activity of  
428 *relA* null mutants can be eliminated by *spoT* null mutations. *J Biol Chem* 1991;**266**: 5980-90.
